# Supplementary material
Source: publisher figshare collection journal article supplement (https://acs.figshare.com/ndownloader/files/10430868)
Supplement: Supplementary file 1 [file 10430868]

## Supporting Information

# First-principles study of Li-ion storage of functionalized Ti<sub>2</sub>C monolayer with vacancies

Qing Wan, Shunning Li, and Jian-Bo Liu\*

Key Laboratory of Advanced Materials (MOE), School of Materials Science and Engineering, Tsinghua University, Beijing 100084, China

E-mail: [jbliu@mail.tsinghua.edu.cn](mailto:jbliu@mail.tsinghua.edu.cn).

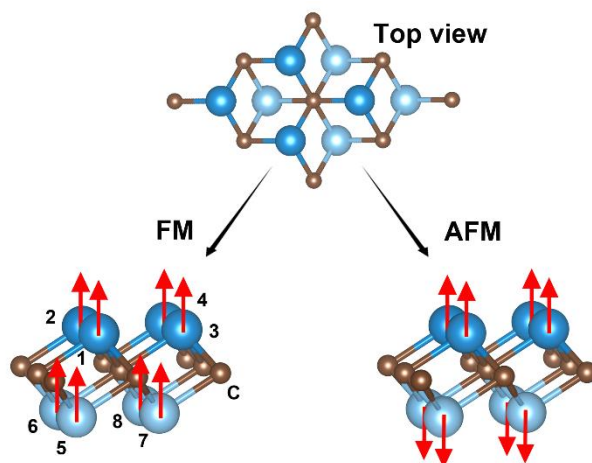

**Figure S1.** Top and side views of  $\text{Ti}_2\text{C}$  monolayer with ferromagnetic (FM) and antiferromagnetic (AFM) configurations. “ $\uparrow$ ” and “ $\downarrow$ ” for the Ti atoms represent two spin directions, corresponding to “+” and “-” in Table S1.

**Table S1.** Magnetic Configuration <sup>A</sup> and relative energy per formula unit for Ti<sub>2</sub>C and Li adsorption energy on the surface of Ti<sub>2</sub>C monolayer in ferromagnetic (FM) and antiferromagnetic (AFM1) states.

| Type | Ti1 | Ti2 | Ti3 | Ti4 | Ti5 | Ti6 | Ti7 | Ti8 | $\Delta E_{\text{tot}}(\text{meV/cell})^{\text{B}}$ | $E_{\text{ad}}(\text{eV})^{\text{C}}$ |
|------|-----|-----|-----|-----|-----|-----|-----|-----|-----------------------------------------------------|---------------------------------------|
| NM   | 0   | 0   | 0   | 0   | 0   | 0   | 0   | 0   | 0                                                   |                                       |
| FM   | +   | +   | +   | +   | +   | +   | +   | +   | -110                                                | -2.26                                 |
| AFM1 | +   | +   | +   | +   | -   | -   | -   | -   | -137                                                | -2.31                                 |
| AFM2 | -   | +   | +   | -   | -   | +   | +   | -   | -25                                                 |                                       |
| AFM3 | -   | +   | +   | -   | +   | -   | -   | +   | -21                                                 |                                       |
| AFM4 | -   | +   | +   | -   | -   | +   | -   | +   | -30                                                 |                                       |
| AFM5 | -   | +   | +   | -   | +   | -   | +   | -   | -25                                                 |                                       |
| AFM6 | -   | +   | -   | +   | -   | +   | -   | +   | 5                                                   |                                       |
| AFM7 | -   | +   | -   | +   | +   | -   | +   | -   | 6                                                   |                                       |

<sup>A</sup> Labels “Ti1-Ti8” are marked in Figure 1a. In this table, “+” represents the upward direction of magnetic moment along the *z* direction as been mentioned above. Conversely, “-” means the downward direction.

<sup>B</sup>  $\Delta E_{\text{tot}}$  indicates the difference of total energy per formula unit for Ti<sub>2</sub>C compared with nonmagnetic.

<sup>C</sup> Adsorption energy of Li atom on the surface of Ti<sub>2</sub>C monolayer in different magnetic states. A 2×2 Ti<sub>2</sub>C cell is used to calculate.

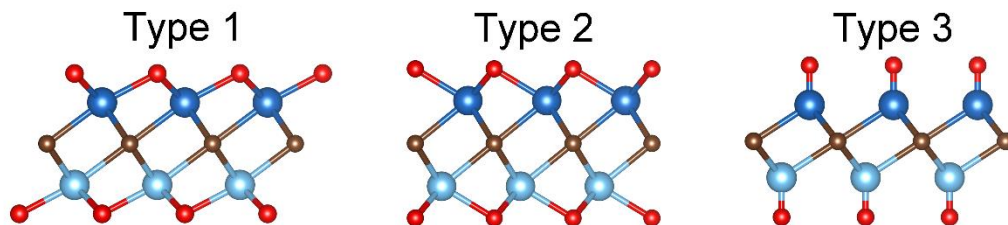

**Figure S2.** Three considered types of  $\text{Ti}_2\text{CT}_2$  ( $\text{T} = \text{O}, \text{F}$  and  $\text{OH}$ ).

**Table S2.** The difference of total energy per formula unit for  $\text{Ti}_2\text{CT}_2$  of the considered types of  $\text{Ti}_2\text{CT}_2$  monolayers. Due to the Type 3 is unstable by the geometry optimization, we just compare the energy between Type 1 and Type 2. A  $3 \times 3$   $\text{Ti}_2\text{C}$  cell is used to calculate.

|                  | O      | F      | OH     |
|------------------|--------|--------|--------|
| Type 1 (eV/cell) | -1.745 | -0.531 | -0.290 |
| Type 2 (eV/cell) | 0      | 0      | 0      |

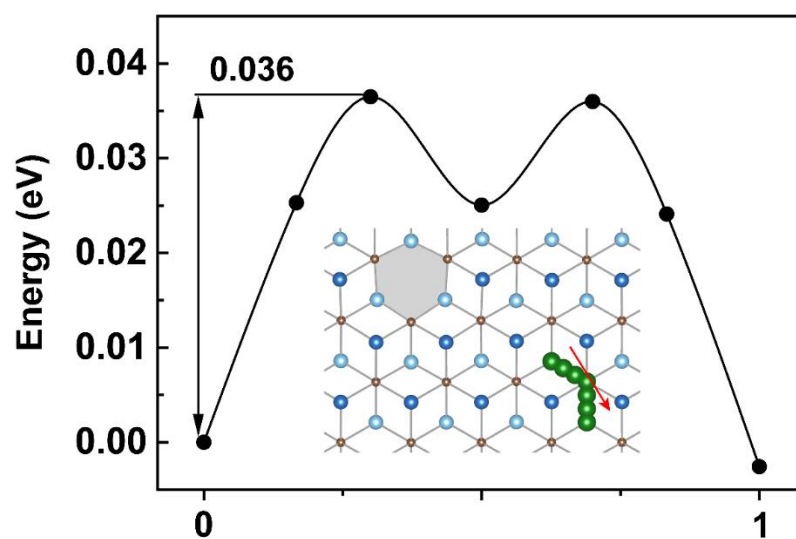

**Figure S3.** Diffusion barriers of Li on Ti<sub>2</sub>C monolayers when Li bypasses titanium vacancy  $V_{\text{Ti}}$ .

**Table S3.** Energy barriers for Li diffusion on the  $\text{Ti}_2\text{C}$  and  $\text{Ti}_2\text{CT}_2$  (T= F or OH) monolayers with different vacancies ( $V_{\text{C}}$  and  $V_{\text{Ti}}$ ).

| $V_{\text{C}}$                     |                   |                     | $V_{\text{Ti}}$   |                     |
|------------------------------------|-------------------|---------------------|-------------------|---------------------|
|                                    | Path              | Energy Barrier (eV) | Path              | Energy Barrier (eV) |
| $\text{Ti}_2\text{C}$              | a $\rightarrow$ b | 0.085               | a $\rightarrow$ b | 0.473               |
|                                    | b $\rightarrow$ c | 0.068               | b $\rightarrow$ c | 0.104               |
|                                    | c $\rightarrow$ b | 0.163               | c $\rightarrow$ b | 0.086               |
|                                    | b $\rightarrow$ a | 0.093               | b $\rightarrow$ a | 0.016               |
| $\text{Ti}_2\text{CF}_2$           | a $\rightarrow$ b | 0.218               | a $\rightarrow$ b | 0.162               |
|                                    | b $\rightarrow$ c | 0.061               | b $\rightarrow$ c | 0.204               |
|                                    | c $\rightarrow$ d | 0.135               | c $\rightarrow$ d | 0.023               |
|                                    | d $\rightarrow$ e | 0.154               | d $\rightarrow$ c | 1.192               |
|                                    | e $\rightarrow$ d | 0.180               | c $\rightarrow$ b | 0.011               |
|                                    | d $\rightarrow$ c | 0.071               | b $\rightarrow$ a | 0.484               |
|                                    | c $\rightarrow$ b | 0.256               |                   |                     |
|                                    | b $\rightarrow$ a | 0.046               |                   |                     |
| $\text{Ti}_2\text{C}(\text{OH})_2$ | a $\rightarrow$ b | 0.025               | a $\rightarrow$ b | 0.242               |
|                                    | b $\rightarrow$ a | 0.037               | b $\rightarrow$ c | 0.048               |
|                                    |                   |                     | c $\rightarrow$ d | 0.046               |
|                                    |                   |                     | d $\rightarrow$ e | 0.413               |
|                                    |                   |                     | e $\rightarrow$ d | 0.169               |
|                                    |                   |                     | d $\rightarrow$ c | 0.598               |
|                                    |                   |                     | c $\rightarrow$ b | 0.113               |
|                                    |                   |                     | b $\rightarrow$ a | 1.011               |

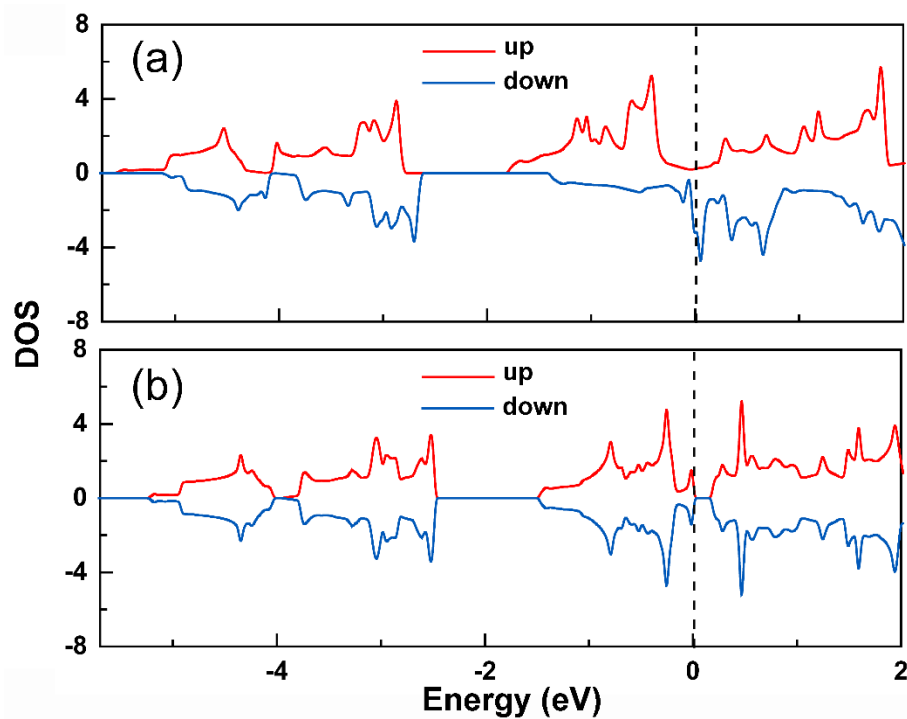

**Figure S4.** Total density of states (DOS) of  $\text{Ti}_2\text{C}$  monolayer with (a) ferromagnetic (FM) and (b) antiferromagnetic (AFM) configurations.

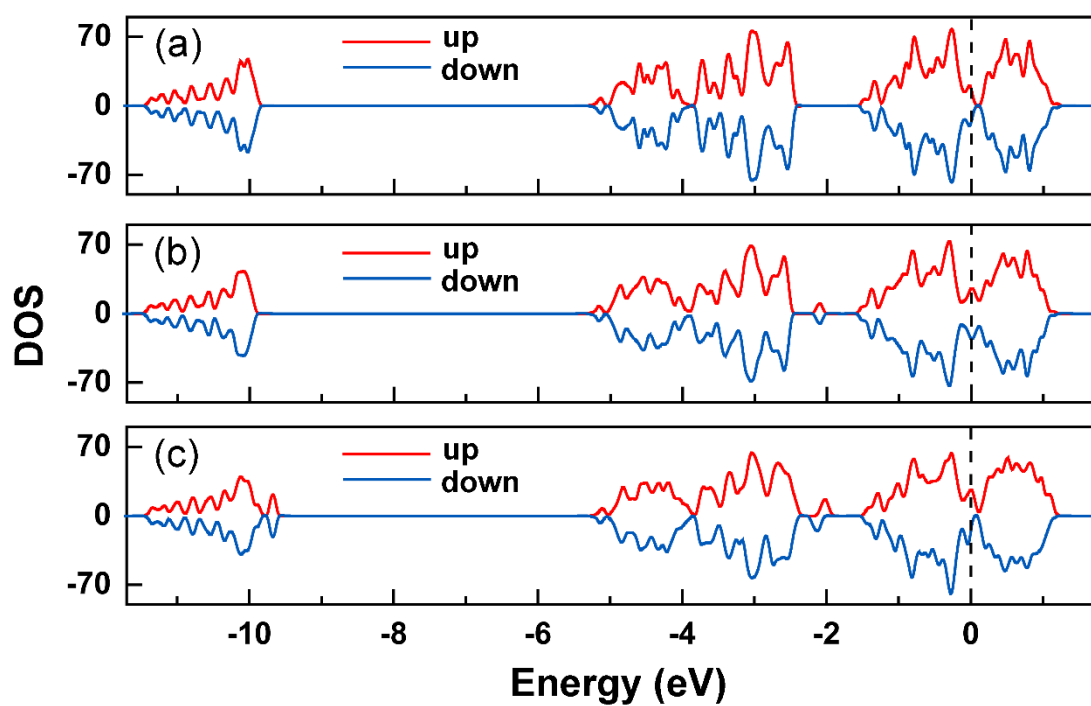

**Figure S5.** Total density of states of (a) pristine Ti<sub>2</sub>C monolayer, (b) with carbon vacancy and (c) with titanium vacancy.



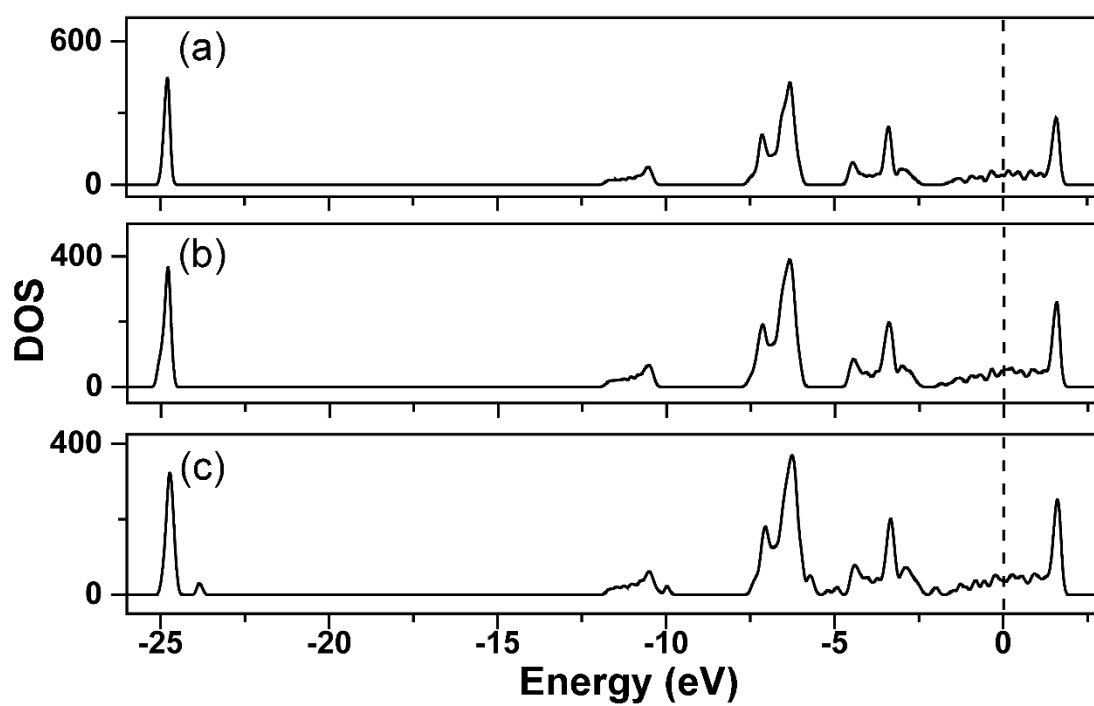

**Figure S6.** Total density of states of (a) pristine  $\text{Ti}_2\text{CF}_2$  monolayer, (b) with carbon vacancy and (c) with titanium vacancy.

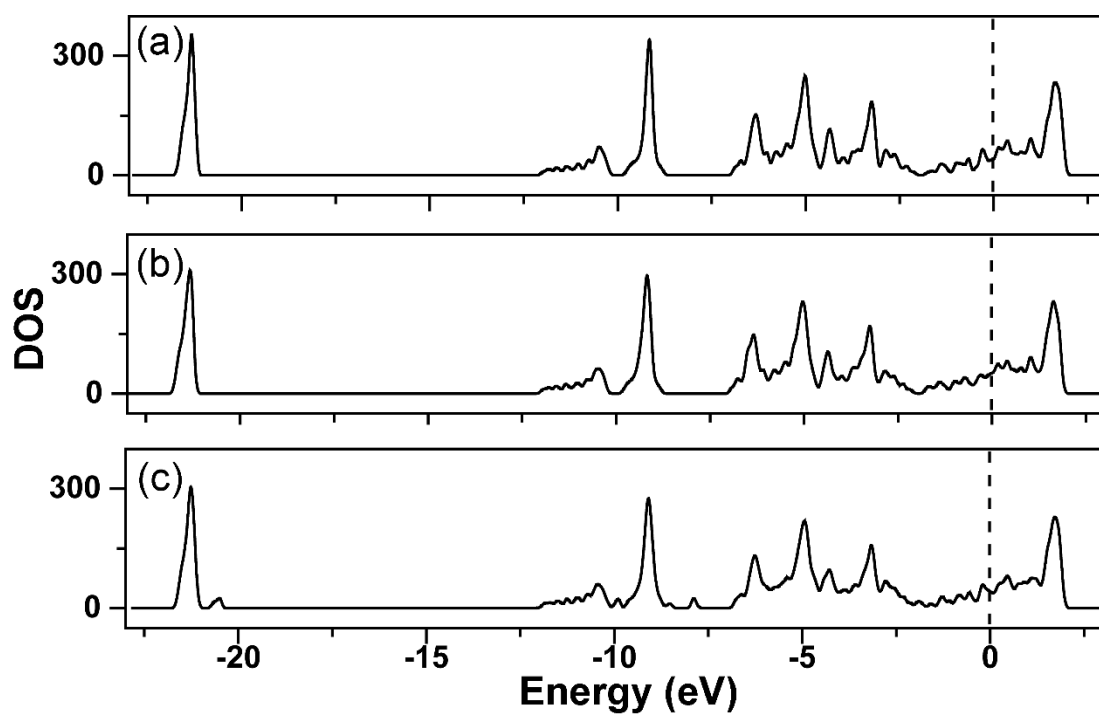

**Figure S7.** Total density of states of (a) pristine  $\text{Ti}_2\text{C}(\text{OH})_2$  monolayer, (b) with carbon vacancy and (c) with titanium vacancy.

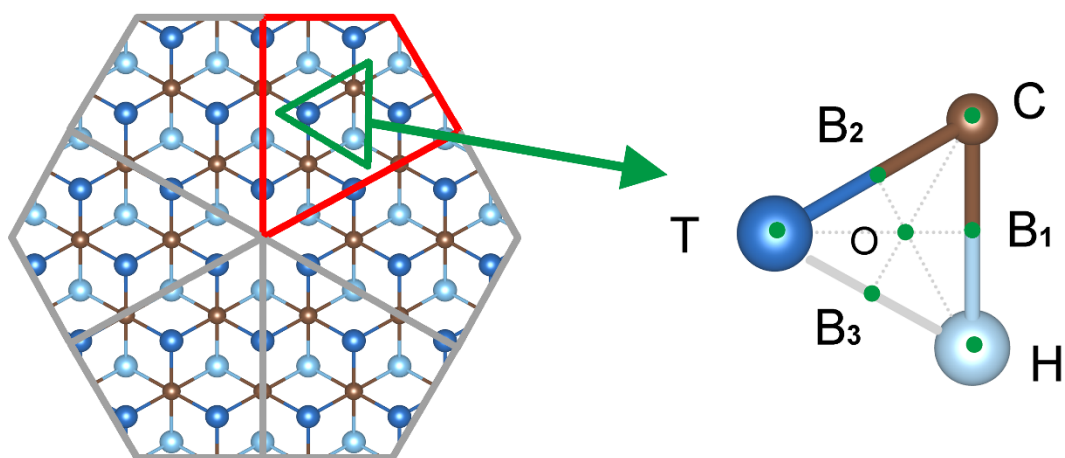

**Figure S8.** The details of depicting the color filled contour plots of adsorption energy.

Taken the situation of Li on  $\text{Ti}_2\text{C}$  monolayers with carbon vacancy as an example, we describe the details of depicting the color filled contour plots of adsorption energy. According to the symmetry, we only choose the area outlined with red quadrilateral to calculate the adsorption energy of Li at specific sites, including sites on top of the atoms (T, H and C sites), on top of the middle point of two neighboring atoms (B1, B2 and B3 sites), and on top of the center of three neighboring atoms (O site). The schematic illustration is shown in Figure S8. Based on the adsorption energy of Li at these sites, a cubic interpolation is applied to depict the color filled contour plots using Matlab (Version R2012a). The final contour plot in the hexagonal area is constructed by the contour plot within the area of red quadrilateral under the symmetry operation. The plots for Li adsorption on other surfaces as concerned in this work are depicted using the same method.
